# Supplementary material for: Low operation voltage macromolecular composite memory assisted by graphene nanoflakes
Source: Royal Society of Chemistry journal article supplement (doi:10.1039/c2tc00010e), 2012-10-30
Supplement: c2tc00010e.pdf [file c2tc00010e.pdf]

*Supplemental Material*  
**Low Operation Voltages Macromolecular Composite  
Memory Assisted by Graphene Nanoflakes**

Ying-Chih Lai<sup>a</sup>, Di-Yan Wang<sup>b</sup>, I-Sheng Huang<sup>b</sup>, Yu-Ting Chen<sup>c</sup>, Yung-Hsuan Hsu<sup>d</sup>,  
Tai-Yuan Lin<sup>e</sup>, Hsin-Fei Meng<sup>d</sup>, Ting-Chang Chang<sup>c</sup>, Ying-Jay Yang<sup>a,f</sup>, Chia-Chun Chen<sup>b,g</sup>,  
Fang-Chi Hsu<sup>h</sup>, and Yang-Fang Chen<sup>i\*</sup>

<sup>a</sup> *Graduate Institute of Electronics Engineering, National Taiwan University, Taipei 106, Taiwan*

<sup>b</sup> *Department of Chemistry, National Taiwan Normal University, Taipei 116, Taiwan*

<sup>c</sup> *Department of Physics, National Sun Yat-Sen University, Kaohsiung 804, Taiwan*

<sup>d</sup> *Institute of Physics, National Chiao Tung University, Hsinchu 300, Taiwan*

<sup>e</sup> *Institute of Optoelectronic Sciences, National Taiwan Ocean University, Keelung 202, Taiwan*

<sup>f</sup> *Center for Emerging Material and Advanced Devices, National Taiwan University, Taipei 106, Taiwan*

<sup>g</sup> *Institute of Atomic and Molecular Sciences, Academia Sinica, Taipei 106, Taiwan*

<sup>h</sup> *Department of Materials Science and Engineering, National United University, Miaoli 360, Taiwan*

<sup>i</sup> *Department of Physics, National Taiwan University, Taipei 106, Taiwan*

*E-mail: yfchen@phys.ntu.edu.tw*

**Electrical properties of memory device fabricated with different GNFs concentrations:**

Figs. S1(a) and (b) show the electrical properties of ITO/GNFs-PVA/Ag devices containing 11.8% and 10.3% GNFs, respectively. There are no apparent rewritable characteristics for those devices, instead they exhibit a write-once-read-many-times type memory effects.<sup>s1</sup>

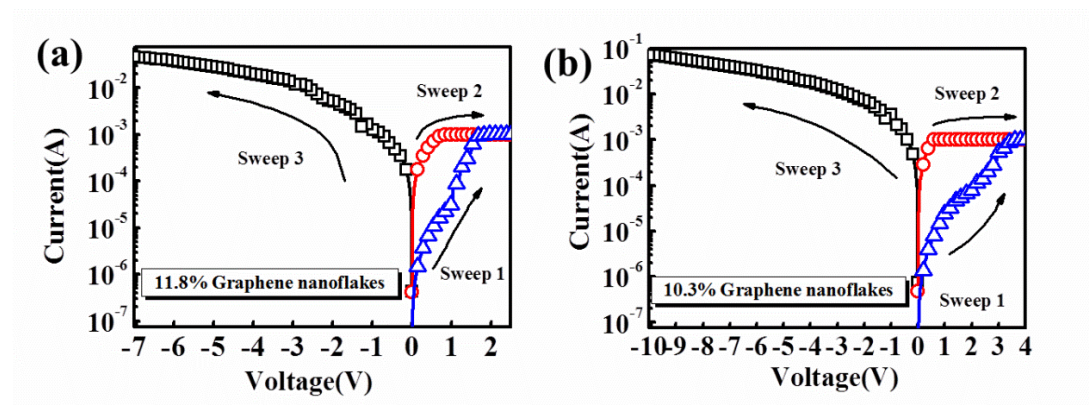

Fig. S1 Electrical properties of ITO/GNFs-PVA/Ag devices containing (a) 11.8% and (b) 10.3% GNFs.

**References**

S1. J. Liu, Z. Yin, X. Cao, F. Zhao, A. Lin, L. Xie, Q. Fan, F. Boey, H. Zhang, W. Huang, *ACS Nano* 2010, **4**, 3987-3992.
